# When an insecticide affects the adaptive value of intraguild predation by an invader

Paula Cabrera<sup>1¶</sup>, Daniel Cormier<sup>2¶</sup>, Marianne Bessette<sup>1&</sup>, Vanessa Cruz<sup>1&</sup> and Éric Lucas<sup>1¶</sup>,

1 : Département de sciences biologiques. Université du Québec à Montréal. 141 Avenue du Président-Kennedy, Montréal, Québec. Canada.

2 : Institut de recherche et de développement en agroenvironnement. 335, rang des Vingt-Cinq Est. Saint-Bruno de Montarville, Québec. Canada

Corresponding author

E-mail: [pcabrerablanco@outlook.com](mailto:pcabrerablanco@outlook.com) (PC)

<sup>¶</sup>These authors contributed equally to this work

<sup>&</sup>These authors also contributed equally to this work

# Abstract

Biological invasions can generate major ecological disturbances, such as changes in species diversity and structure of communities. It is believed that the multicolored Asian ladybeetle, *Harmonia axyridis* Pallas (Col, Coccinellidae), recognized as one of the most invasive insects in the world, has reduced native coccinellids populations in several areas and is considered as a threat for biodiversity at large. A significant trait, favoring its invasiveness and its dominance over indigenous ladybeetles, is intraguild predation (IGP). IGP has advantageous adaptive value for individuals, removing competitors, potential predators and providing an alternative nutritive resource, when main resources are scarce. Previous research demonstrated that this invasive ladybeetle is highly susceptible to the reduced-risk insecticide novaluron, a chitin synthesis inhibitor, whereas the North American indigenous competitor, *Coleomegilla maculata* DeGeer (Col, Coccinellidae), is not. Our study explores the adaptive value of IGP for each of the two coccinellids after preying on each other's larvae, previously treated with insecticide. Our first hypothesis is that the invasive ladybeetle, susceptible to the insecticide, should lose the adaptive value of IGP, while the native predator not. Our second hypothesis is that the adaptive value of IGP for the invasive predator will be recovered over time, as a result of neutralisation of the insecticide by the intraguild prey (native species). The results support both hypotheses, and show that an insecticide can completely remove the adaptive value of IGP for the invader, while it does not change for the indigenous ladybeetle. Moreover, the study demonstrates that if the intraguild prey (non-susceptible to the insecticide) undergoes molt after being exposed to the insecticide, the adaptive value for the intraguild predator is restored.

## Introduction

Biological invasions can interfere with several ecological and evolutionary processes [1], such as changes in species diversity and structure of communities [2], affecting ecosystem services and causing huge economic losses [3-5]. Some of the traits that characterize invasive species are high adaptability to changes in the environment, high fecundity and dispersion [6, 7], and broad diet range [8-10]. Another factor contributing to the success of invaders is competitive ability, and more specifically intraguild predation (IGP) [11-14]. IGP, is defined as the predation on a competitor [15], and confers adaptive advantages for of the intraguild predator. These include removal of competitors, removal of potential predators, and an alternative nutritive resource when main resources (extraguild prey) are scarce. Therefore, IGP has important consequences for the distribution, abundance, and evolution of species involved (intraguild predator, intraguild prey and shared resource) [16] as well as for applied topics such as conservation management and biological control [17, 18].

The multicolored Asian ladybeetle, *Harmonia axyridis* Pallas (Col., Coccinellidae), widely recognized as one of the most invasive insects on the world [10, 19, 20], has been introduced in numerous ecosystems worldwide [19, 21-29]. As an invasive species, it has caused adverse impacts on the wine industry [30-32] and as a household invader during winter. It is an effective generalist predator of numerous hemipteran pests [33], with higher fertility and fecundity than competitive ladybeetle species [27, 34-35], significant adaptability and resilience [36], and has a dominant role as an intraguild predator [37-41]. These attributes suit the multicolored Asian ladybeetle to be a top predator according to several experts [42]. Consequently, it has reduced

67 diversity of natural enemies in certain regions, especially ladybeetles, [33] through exploitative  
68 competition and intraguild predation [34, 39, 43-44].

69 The twelve spotted ladybeetle, *Coleomegilla maculata* (DeGeer) (Col., Coccinellidae), is one of  
70 the sympatric competitors of *H. axyridis*, in Nearctic apple orchards [45] as well as in other  
71 agricultural ecosystems, such as potato [46-47] and sweet corn [24]. This ladybeetle, is an  
72 indigenous generalist predator in North America, and an important biocontrol agent in various  
73 crops [45, 47-49] that also participates in IGP with other coccinellids. Thus, both coccinellids, *C.*  
74 *maculata* and *H. axyridis*, frequently engage in mutual IGP [50].

75 Although IGP has an important adaptive value for the intraguild predator, it also involves  
76 certain risks, such as the risk of injuries or an increase of exposure to pesticides [51]. Moreover,  
77 it has been proposed that 75 % of the biodiversity can be concentrated in agricultural  
78 landscapes and thus, species are exposed to pesticides used for plant protection [52]. Despite  
79 of this, very few studies have addressed the impact of pesticides on IGP [51, 53]. Besides, it  
80 remains difficult to establish how pesticide applications may affect success of invasive species  
81 using IGP as competitive arm.

82 Previous research has shown that novaluron (Rimon® EC 10), a reduced-risk insecticide (RRI)  
83 and chitin synthesis inhibitor [54], used to control the codling moth, *Cydia pomonella* (L.) (Lep.,  
84 Tortricidae), a major pest in Quebec apple orchards [55], has differential lethal and sublethal  
85 effects on *H. axyridis* compared to *C. maculata*, the multicolored Asian ladybeetle being  
86 drastically more susceptible to the insecticide than its indigenous intraguild competitor [56-57].  
87 Insects can overcome the effects of toxic compounds by tolerating them or neutralizing them

88 by several mechanisms, such as sequestration, excretion and detoxification [58], and these can  
 89 determine differences in susceptibilities to pesticides among natural enemies [59].

90 The aims of this study are 1) to compare the adaptive value of mutual IGP, for the two  
 91 coccinellids, the invasive and the native species, when the IGP prey faced exposition to an  
 92 insecticide used in the invaded area; and 2) to investigate if the effect of the exposition on the  
 93 adaptive value of IGP can disappear over time through neutralisation of the insecticide by the  
 94 intraguild prey, the least susceptible species (the indigenous) to novaluron. We hypothesize  
 95 that the adaptive value of IGP, for the indigenous tolerant twelve spotted ladybeetle, will be  
 96 maintained in the presence of the insecticide, whereas it will be greatly reduced for the  
 97 susceptible invasive Asian ladybeetle. We also hypothesize that the adaptive value of IGP for  
 98 the susceptible invasive species will be recovered, after a period, when the native IG prey will  
 99 have neutralized the insecticide.

## 100 **Materials and methods**

### 101 **Insects**

102 Laboratory rearings of *C. maculata* and *H. axyridis* originated from ladybeetle adults  
 103 collected in the field in Quebec in 2016 at Sainte-Agathe (46°23'0.3"N and 71°24'33.5"W). New  
 104 individuals coming from the field were added every year to the rearings. These were in a  
 105 growth chamber at 24°C, 16L: 8D, and 70% RH at Laboratoire de Lutte Biologique from the  
 106 Université du Québec à Montréal. Insects were provided with pollen, sweetened water solution

(10 % sugar), and green peach aphids, *Myzus persicae* (Sulz.) (Hem., Aphididae), reared on potato plants, *Solanum tuberosum* L.

## Insecticide

Rimon® 10 EC (Makhteshim Agan of North America, Raleigh, NC) field rate recommended for apple orchards in Quebec (100 g a.i. ha<sup>-1</sup>) and a spray volume of 1000 litres ha<sup>-1</sup>, most used by apple growers in Quebec, were considered in the concentration for bioassays: 100 mg a.i. litre<sup>-1</sup> novaluron.

## Bioassays

A first bioassay was intended to assess the effect of novaluron on intraguild predation by both coccinellid species on the other one. A second bioassay was performed to explore neutralisation of pesticide by *C. maculata* as an intraguild prey, and its effect on *H. axyridis* as the intraguild predator.

## Effect of the insecticide on intraguild predation

Experimental units consisted in a newly molted second instar *C. maculata* or *H. axyridis* larvae (intraguild predator), individually weighted, and placed in 5 cm Petri dishes with 5 first instar larvae from the opposite ladybeetle species (intraguild prey), previously treated with novaluron or water with a Potter Tower (1 ml solution and 2 mg cm<sup>-2</sup> aqueous insecticide deposit) and euthanized by freezing to avoid cannibalism. Also thawed for 3 min at 20°C before the bioassay (Fig 1). Each experimental unit was replicated 17 times. Intraguild predators and prey were left together during 24 h. Leftovers of intraguild prey were noted and removed

afterwards. After that, intraguild predators were fed with *M. persicae* aphids daily until the adult stage. Mortality and stage of development were noted on a daily basis. Once the individuals became adults, they were weighted again.

**Figure 1. Experimental design used to assess the effect of novaluron on IGP.** Each experimental unit consisted of a second instar larva (intraguild predator) placed with five 1st instar newly hatched larvae from the opposite coccinellid species. Each experimental unit was replicated 17 times.

# **Neutralisation of the insecticide by the indigenous intraguild prey, *C. maculata* and its effect on the invasive intraguild predator *H. axyridis*.**

Three treatments, representing three situations of neutralisation of the insecticide in the intraguild prey, were considered in this bioassay:

- a) **T0:** 1<sup>st</sup> instar larvae of the indigenous ladybeetle or aphids, insecticide or water treated, and immediately euthanized,
- b) **T-24h:** first instar larvae of the indigenous ladybeetle or aphids, insecticide or water treated and euthanized 24 h after,
- c) **T-Molt:** first instar larvae of the indigenous ladybeetle or aphids, insecticide or water treated and euthanized after molt to 2<sup>nd</sup> instar.

Additionally, three treatments were associated to each of the treatments mentioned above;

**1- XG-Water:** Aphids treated with water, representing optimal extraguild prey, and offered *ad libitum* to intraguild predators,

**2- IG-Water:** 1<sup>st</sup> instar larvae of the indigenous LB, treated with water, and

**3- IG-Insecticide:** 1<sup>st</sup> instar larvae of the indigenous LB, treated with the insecticide (novaluron).

A Potter tower was used to treat larvae (1 ml solution and 2 mg/cm<sup>2</sup> aqueous insecticide deposit). All preys were weighted prior to freezing. Experimental units were replicated 17 times and consisted of five *C. maculata* larvae, thawed during 3 min at 20°C, and placed in a 5 cm Petri dish with a newly molted 3<sup>rd</sup> instar *H. axyridis* larva, previously starved during 24 h. Third instar larvae were used as intraguild predators in this bioassay, in order to encourage IGP by reducing the prey/predator body mass ratio. Intraguild predators were in contact with extraguild and intraguild prey during 24 h. Intraguild and extraguild prey leftovers were noted and removed afterwards and intraguild predators were fed with fresh green peach aphids daily until reaching the adult stage. Mortality was assessed daily and *H. axyridis* individuals were weighted after reaching adult stage.

## Calculations and statistical analyses

Differences in frequencies of mortality in both bioassays were evaluated with a Chi<sup>2</sup> test ( $\alpha = 0.05$ ) [60], and pairwise comparisons, with Bonferroni corrections of the p value, were performed to detect differences among treatments [61]. Results are presented as mortality



percentages. Survival was analysed by means of Survival Analysis and a Proportional Hazard model to detect differences among groups [62].

Voracity of the intraguild predator was calculated by assessing 1<sup>st</sup> instar larvae (intraguild prey) leftovers after 24 h of IGP. Mass of consumed prey (mg) was estimated from percentages of leftover prey and weight of prey before freezing (for the neutralisation of the insecticide by the intraguild prey section). Weight increase of intraguild predators until the adult stage was calculated subtracting second or third instar larvae initial weight from adult weight (g). This variable, as well as voracity, were analysed with the independent samples Student's t test ( $\alpha = 0.05$ ) to investigate the effect of novaluron on both ladybeetle species and with Analysis of Variance and the Tukey test or the non-parametric Wilcoxon test and the Steel-Dwass All Pairs test ( $\alpha = 0.05$ ) (SAS Institute, 2015) to detect differences among treatments in the case of the effect of insecticide neutralisation by intraguild prey on *H. axyridis*, since data did not always meet the normality assumption. Time of development of *C. maculata* as the intraguild predator, in the first bioassay, was examined with the independent samples Student's t test ( $\alpha = 0.05$ ) [59] and time of development of *H. axyridis* in the second bioassay was investigated with the Wilcoxon test ( $\alpha = 0.05$ ) [63]. JMP software v.12.1 (SAS Institute, Cary, NC) was used to perform all statistical analyses.

## Results

### Effect of the insecticide on intraguild predation

#### Voracity of intraguild predators

There were no differences in voracity between the insecticide treatment and the control,  $t_{(30.99)} = 1.469$ ,  $p = 0.152$  for the indigenous ladybeetle. A different trend was found for *H. axyridis*. Less prey was ingested in the insecticide treatment than in the control  $t_{(29.37)} = -2.283$ ,  $p = 0.0299$  (Table 1).

**Table 1. Voracity of intraguild predators after 24 h feeding on intraguild prey treated with water or insecticide. Comparisons within lines. Student t test ( $p < 0.05$ )**

|                       | Intraguild prey consumed (% $\pm$ SE) |                    |
|-----------------------|---------------------------------------|--------------------|
|                       | Control                               | Insecticide        |
| Indigenous ladybeetle | 42.81 $\pm$ 7.27 A                    | 58.06 $\pm$ 7.41 A |
| Invasive ladybeetle   | 61.56 $\pm$ 7.33 a                    | 40.00 $\pm$ 5.96 b |

#### Mortality-survival of intraguild predators

After feeding on intraguild prey (first instar invasive ladybeetle) treated with novaluron, mortality of indigenous ladybeetle second instar larvae, was not different than the control,  $\chi^2_{(1)} = 0.013$ ,  $p = 0.9086$  (Fig 2-a). Surviving individuals molted normally and completed development until the adult stage. In the case of the invader *H. axyridis*, all larvae died after IGP in the novaluron treatment, which mortality was significantly higher than the control,  $\chi^2_{(1)} = 15.245$ ,  $p < 0.0001$  (Fig 2-b). Survival analysis for intraguild predators, preying on intraguild prey treated with the insecticide, reveals a significant difference between survivals of both species over

time,  $X^2_{(1)} = 12.731$ ,  $p = 0.0004$ . All *H. axyridis* larvae died between the first and fifth day following IGP and none of the predators were able to molt before death, whereas 70% of indigenous *C. maculata* individuals reached the adult stage (Fig 2-d).

**Figure 2.** a) Mortality of the indigenous ladybeetle as the intraguild predator, b) Mortality of the invasive ladybeetle as the intraguild predator, after 24 h exposure of 2nd instar larvae (intraguild preys) to water or insecticide-treated preys.  $\chi^2$  ( $p < 0.05$ ), c) Survival and time of death of intraguild predators after ingestion of intraguild prey treated with water and d) treated with the insecticide. Kaplan-Meier survival curves ( $p < 0.05$ ).

## Time of development and weight increase (indigenous ladybeetle)

Since all *H. axyridis* individuals in the insecticide treatment died at the second larval instar, results of time of development and weight increase were obtained only for *C. maculata* in this treatment. Time of development until adult stage, after IGP, for the twelve spotted ladybeetle, in the insecticide treatment, was not different than the control  $t_{(21)} = 0.622$ ,  $p = 0.541$  (Fig 3-a).

Weight increase was not statistically different between the control and novaluron treatments,  $t_{(17.97)} = 2.08$ ,  $p = 0.0521$  (Fig. 3-b).

**Figure 3.** a) Time of development (days + SE) and b) weight increase (mg ± SE) of the indigenous ladybeetle, from 2nd instar larvae until adult stage, after 24 h feeding on intraguild prey treated with water or insecticide. Student t test ( $p < 0.05$ )

**Neutralisation of the insecticide by the indigenous intraguild prey and its effect on the invasive intraguild predator.**

**Voracity of the invasive ladybeetle**

*Harmonia axyridis* consumed similar proportions of intraguild prey treated with water in the three treatments:  $\chi^2_{(1)} = 5.004$ ,  $p = 0.082$ . When comparing voracity of *H. axyridis* preying upon *C. maculata*, treated with novaluron, among the three treatments, there were slightly more intraguild preys consumed in the T0 treatment compared to the other treatments. However the T-24h treatment was not different from T-Molt:  $F_{(2)} = 11.12$ ,  $p = 0.0002$  (Table 2.).

**Table 2. Voracity of *H. axyridis* after 24h preying upon extraguild (XG) and intraguild (IG) prey treated with insecticide or water. Comparisons are done within lines. ANOVA or Wilcoxon test ( $p < 0.05$ ).**

| Treatment      | Consumed prey (mg ± SE) |                       |                       |
|----------------|-------------------------|-----------------------|-----------------------|
|                | T0                      | T-24h                 | T-Molt                |
| XG-Water       | 7.37 ± 1.95 <b>a</b>    | 9.76 ± 1.20 <b>a</b>  | 7.79 ± 0.93 <b>a</b>  |
| IG-Water       | 0.77 ± 0.10 <b>A</b>    | 0.92 ± 0.17 <b>A</b>  | 1.16 ± 0.18 <b>A</b>  |
| IG-Insecticide | 1.07 ± 0.05 <b>A'</b>   | 0.40 ± 0.04 <b>B'</b> | 0.69 ± 0.16 <b>B'</b> |

## Mortality-survival of the invasive ladybeetle as the intraguild predator

Mortality of *H. axyridis* was not different among the three neutralisation treatments (T0, T-24h and T-Molt), when consuming water-treated extraguild prey, this is green peach aphids:  $\chi^2_{(2)} = 0.31$ ,  $p = 0.851$ . Similarly, no differences were found among treatments when intraguild predators consumed *C. maculata* first instar larvae treated with water,  $\chi^2_{(2)} = 0.857$ ,  $p = 0.652$ . However, when comparing mortality frequencies of the invasive ladybeetle after feeding on the indigenous ladybeetle treated with novaluron, the T-Molt treatment showed significantly less mortality  $\chi^2_{(1)} = 23.221$ ,  $p < 0.0001$ ; T-24h vs T-Molt:  $\chi^2_{(1)} = 13.55$ ,  $p = 0.0002$ ; T0 vs T-Molt:  $\chi^2_{(1)} = 13.38$ ,  $p = 0.0003$  (Bonferroni  $\alpha = 0.025$ ). Moreover, it was found that intraguild predators feeding on prey treated with novaluron in treatments T0 and T-24h had a higher mortality than their controls of extraguild prey and intraguild prey treated with water ( $\chi^2_{(1)} = 20.285$ ,  $p < 0.0001$ ; T0-IG-Insecticide vs T0-XG-Water:  $\chi^2_{(1)} = 14.4$ ,  $p = 0.0001$ ; T0-IG-Insecticide vs T0-IG-Water:  $\chi^2_{(1)} = 17.14$ ,  $p < 0.0001$  and  $\chi^2_{(1)} = 19.217$ ,  $p < 0.0001$ ; T-24h-IG-Insecticide vs T-24h-XG-Water:  $\chi^2_{(1)} = 16.22$ ,  $p < 0.0001$ ; T-24h-IG-Insecticide vs T-24h-IG-Water:  $\chi^2_{(1)} = 13.55$ ,  $p = 0.0002$ , Bonferroni  $\alpha = 0.017$  respectively ) (Fig 4-a).

A comparison of survival of the invasive ladybeetle over time among the three neutralisation treatments, after IGP on prey treated with novaluron, showed that 70 % of individuals in the T-Molt treatment became adults, whereas all individuals died in treatments T0 and T-24h before nine days (Fig 4-b). The Proportional Hazard Model indicated that this difference was significant:  $\chi^2_{(2)} = 19.91$ ,  $p < 0.0001$ . Moreover, individuals in T0/IG-Insecticide were  $\pm 15$  times more prone to die than individuals in T-Molt/IG-Insecticide ( $p < 0.0001$ ). Similarly, larvae in T-

257 24h/IG-Insecticide had  $\pm 11$  times probabilities of death than larvae in T-Molt-IG-Insecticide ( $p =$   
258 0.0002).

259

260 **Figure 4.** a) Mortality of the invasive ladybeetle (intraguild predator), after 24 h exposure of 3<sup>rd</sup>  
261 instar larvae to water or insecticide-treated intraguild preys, in treatments of neutralisation of  
262 the insecticide by the intraguild prey ( $\chi^2$  ( $\alpha = 0.05$ )) and b) survival of intraguild predators  
263 after ingestion of intraguild prey treated with insecticide in three neutralisation treatments.  
264 Kaplan-Meier survival curves ( $p < 0.05$ ). **T0:** 1<sup>st</sup> instar larvae of the indigenous ladybeetle or  
265 aphids, insecticide or water treated, and immediately euthanized; **T-24h:** first instar larvae of  
266 the indigenous ladybeetle or aphids, insecticide or water treated and euthanized 24 h after; **T-**  
267 **Molt:** first instar larvae of the indigenous ladybeetle or aphids, insecticide or water treated and  
268 euthanized after molt to 2<sup>nd</sup> instar; **XG-Water:** Aphids treated with water; **IG-Water:** 1<sup>st</sup> instar  
269 larvae of the indigenous ladybeetle, treated with water; **IG-Insecticide:** 1<sup>st</sup> instar larvae of the  
270 indigenous ladybeetle, treated with insecticide (novaluron).

271

## 272 Time of development and weight increase of the invasive ladybeetle

273 Data from T0 and T-24h with treated intraguild preys are absent, since no individual reached  
274 the adult stage. No significant differences among treatments were found in the time of  
275 development after IGP, from third instar to adult stage:  $\chi^2_{(6)} = 1.16$ ,  $p = 0.98$  (Fig 5-a).

Similarly to time of development, no significant differences were detected in weight increase among treatments:  $X^2_{(6)} = 11.93$ ,  $p = 0.064$  (Fig 5-b).

**Figure 5.** a) Time of development (days) of the invasive *H. axyridis*, from 3<sup>rd</sup> instar larvae until adult stage, after 24 h feeding on intraguild prey treated with water or insecticide and extraguild prey; b) Weight increase (mg) of *H. axyridis* from third instar larvae until adult stage, after 24 h feeding on intraguild prey treated with insecticide or water and extraguild prey. Wilcoxon test ( $\alpha = 0.05$ ). **T0**: 1<sup>st</sup> instar larvae of the indigenous ladybeetle or aphids, insecticide or water treated, and immediately euthanized; **T-24h**: first instar larvae of the indigenous ladybeetle or aphids, insecticide or water treated and euthanized 24 h after; **T-Molt**: first instar larvae of the indigenous ladybeetle or aphids, insecticide or water treated and euthanized after molt to 2<sup>nd</sup> instar; **XG-Water**: Aphids treated with water; **IG-Water**: 1<sup>st</sup> instar larvae of the indigenous ladybeetle, treated with water; **IG-Insecticide**: 1<sup>st</sup> instar larvae of the indigenous ladybeetle, treated with insecticide (novaluron).

## Discussion

### Effect of the insecticide on the adaptive value of IGP for the invasive and the indigenous predators

Our results support our 1<sup>st</sup> hypothesis that the adaptive value of IGP, for the invasive multicolored Asian ladybeetle, is completely lost when preying on intraguild prey treated with

the insecticide. Furthermore, it is in accordance with previous research, confirming a differential susceptibility of both predator species to the reduced risk insecticide novaluron [56-57]. At the opposite, after preying on intraguild insecticide-treated prey during 24 h, the adaptive value of IGP was maintained for the tolerant indigenous twelve spotted ladybeetle. Survival success was not different than survival in absence of the insecticide and neither voracity and weight increase, nor developmental time, were altered.

IGP is particularly advantageous for the adaptive value of intraguild predators, by removing competitors and potential predators, gaining energy and nutrition and consequently surviving, developing and reproducing when extraguild prey densities are low [16]. For instance, pollen is consumed by coccinellids at the beginning of the growing season in temperate regions, when prey densities are low, but in general it does not allow maturation of ovaries, therefore IGP is beneficial at that period [39]. Additionally, by the end of the season, IGP can help immature stages of predators to reach the adult stage, the overwintering stage in ladybeetles [64, 65]. However, our results show that an insecticide can drastically alter the outcome of IGP and even, completely cancel out its adaptive value for the intraguild predator.

Intraguild prey containing novaluron do not deter the invasive ladybeetle from consuming it and therefore, mortality is devastating for this insect after being exposed to contaminated prey for only 24 h. Which means that, in presence of novaluron, IGP is no longer an advantage for this predator. The adaptive value is completely lost and IGP becomes a highly risky behaviour, which it is not the case for the indigenous *C. maculata*. Thus, consequences of IGP between both, the indigenous and the invasive ladybeetles are reversed by the insecticide.



At a population level, a shift in the dominance of species on the coccinellid assemblage might be expected, particularly under conditions favoring IGP, such as scarcity of extraguild prey [66-67] or habitats with little structure [68-69]. In this context, an insecticide might reduce populations of an invasive species, releasing populations of indigenous coccinellids as well as other natural enemies. Declines of natural enemies of Hemipterans, especially indigenous lady beetles in several regions where the multicolored Asian ladybeetle has established, have been attributed to interspecific competition for resources and the strong intraguild predation abilities of this invasive species [13]. Yet, the outcome of these repercussions in communities will depend on susceptibilities of intraguild members to the toxic compound, in populations.

## **Neutralisation of intraguild prey and its effect on the intraguild predator**

Our second hypothesis stating that the adaptive value of IGP, lost as a consequence of intraguild prey contamination by an insecticide, is recovered over time, is also supported by the results. This might be linked to neutralisation of the compound by the intraguild prey. Survival of the intraguild predator is significantly higher after feeding on contaminated intraguild prey having molted to the next stage compared to intraguild prey more recently treated. Results of voracity show that this finding is not due to a lower consumption of treated intraguild prey compared to the T-24h treatment. Weight increase of the intraguild predator, after predation on treated intraguild prey does not differ from weight increase after consumption of extraguild prey or intraguild prey treated with water in the highest intraguild prey neutralisation situation.

The same trend is observed for the time of development of the intraguild predator. Therefore, benefits of intraguild predation are recovered over time.

Several phenomena may explain predator susceptibility to insecticides, among these, penetration, absorption and neutralisation may be significant. Penetration through the cuticle and rate of absorption of the compound in the arthropod body following topical contact or gut wall after ingestion may differ among species [54, 59]. Neutralisation can also be different among species. Toxic compounds can be neutralized by insects through sequestration (storage of compounds in an unaltered form), increased rates of excretion (removal of the toxic substance without altering its integrity) and detoxification (biochemical transformation of the compound in a way that it won't harm the insect) [57]. Although we do not know how these mechanisms are involved, we formulate three hypotheses that might explain the recovery of the adaptive value of IGP by the intraguild predator over time: a) low penetration of the insecticide through the cuticle/gut wall of the intraguild prey, which is shed during the next molt or/and b) physiological neutralisation of the insecticide by the intraguild prey, occurring over time, c) elimination via feces. Thus, the outcome of IGP for the intraguild predator depends on the time that has passed, after exposure of the intraguild prey to the insecticide, specifically the time that is required for the intraguild prey to shed the contaminated cuticle or/and neutralise the insecticide to levels that will not harm the predator. The ability of *C. maculata* to neutralize the insecticide could be explained by a preadaptation to deal with toxic secondary plant compounds, since this species seems to be more phytophagous than *H. axyridis* [49, 70]. This hypothesis has already been mentioned in previous articles [56-57] but must be tested in future research.

The present investigation suggests that pesticide regime should be taken in consideration when assessing the ecological impact of invasive species in a new environment. Studies of lethal and sublethal effects of compounds used in the environment involved, as well as effects on behaviour of invaders and intraguild interactions at a population level, should be envisaged. Our research also highlights the side effects of reduced-risk insecticides (novaluron) on beneficial organisms and potentially on invasive species and their ecological consequences. Novaluron is a wide spectrum insecticide highly toxic for the Asian ladybeetle [56-57], as well as for other natural enemies found orchards, such as the lacewing *Chrysoperla carnea* (Stephens) (Neur., Chrysopidae), the predatory plant bug *Deraeocoris brevis* (Uhler) (Hem., Miridae), the ladybeetle *Hippodamia convergens* Guérin-Ménéville (Col., Coccinellidae), and the mite predators *Galendromus occidentalis* (Nesbitt) [71] and *Neoseiulus fallacis* (Garman) (Aca., Phytoseiidae) [72].

However, certain natural enemies are less susceptible to it, as it is the case of the twelve spotted ladybeetle [56-57] and the parasitoid *Aphelinus mali* (Hald.) (Hym., Aphelinidae) [71]. Accordingly, as mentioned in 4.1., impact of IGP on coccinellid assemblages, as well as on aphidophagous guilds facing pesticides will be determined by the variability of susceptibilities among guild members as well as neutralisation of toxic compounds by intraguild preys.

Moreover, insecticides can modify the composition of guilds, altering occurrences of competitors, which changes the dynamics of the guild and the frequency of encounters for IGP. Our results suggest that direct and indirect effects of insecticide treatments in agroecosystems

379 are likely to have important impacts on ecosystem services of guilds, particularly on biocontrol  
380 by interfering with IGP.

381 The present study highlights the impact of an insecticide on an adaptive behaviour for a top  
382 predator, which is one of the key factors associated to the invasive status of the multicolored  
383 Asian ladybeetle worldwide. At an ecological level, our findings show that an insecticide might  
384 alter not only guild composition but also disturb intraguild interactions and consequently alter  
385 cascade effects in trophic systems.

## 386 **Acknowledgements**

387 We thank Jill Vandermeersch for her advice with statistics, Franz Vanoosthuyse for technical  
388 support, and Chloé Savoie, Maryse Pelletier, Mathieu Lemieux, and Marie Elen Dupuis for  
389 assisting with ladybeetle bioassays.

## 390 **References**

- 391 1. Mooney HA, Cleland EE. The evolutionary impact of invasive species. *Proc Natl Acad Sci USA*.  
392 2001; 98(10): 5446-5451.
- 393 2. Strayer DL, Eviner VT, Jeschke JM, Pace ML. Understanding the long-term effects of species  
394 invasions. *Trends Ecol Evol*. 2006; 21(11): 645-651.
- 395 3. Pejchar L, Mooney HA. Invasive species, ecosystem services and human well-being. *Trends*  
396 *Ecol Evol*. 2009; 24(9): 497-504.

- 397 4. Vilà M, Basnou C, Pyšek P, Josefsson M, Genovesi, P, Gollasch, S, Roy D, et al. How well do we  
398 understand the impacts of alien species on ecosystem services? A pan-European, cross-taxa  
399 assessment. *Front Ecol Environ*. 2010; 8(3): 135-144.
- 400 5. Walsh JR, Carpenter SR, Vander Zanden MJ. Invasive species triggers a massive loss of  
401 ecosystem services through a trophic cascade. *Proc Natl Acad Sci USA*. 2016; 113(15): 4081-  
402 4085.
- 403 6. Kolar CS, Lodge DM. Progress in invasion biology: predicting invaders. *Trends Ecol Evol*. 2001;  
404 16(4): 199-204.
- 405 7. Sakai A K, Allendorf FW, Holt JS, Lodge DM, Molofsky J, With KA, Ellstrand NC, et al. The  
406 population biology of invasive species. *Annu Rev Ecol Syst*. 2001; 32(1): 305-332.
- 407 8. Crowder DW, Snyder WE. Eating their way to the top? Mechanisms underlying the success of  
408 invasive insect generalist predators. *Biol Invasions*. 2010; 12(9): 2857-2876.
- 409 9. Evans EW, Soares AO, Yasuda H. Invasions by ladybugs, ladybirds, and other predatory  
410 beetles. *BioControl*. 2011; 56(4): 597-611.
- 411 10. Snyder WE, Evans EW. Ecological effects of invasive arthropod generalist predators. *Annu*  
412 *Rev Ecol Syst S*. 2006; 37: 95-122.
- 413 11. Eubanks MD, Blackwell SA, Parrish CJ, Delamar ZD, Hull-Sanders H. Intraguild predation of  
414 beneficial arthropods by red imported fire ants in cotton. *Environ Entomol*. 2002; 31(6):  
415 1168-1174.

- 416 12. Michaud JP. Coccinellids in biological control. In: Hodek I, Honek A, Van Emden HF, editors.  
417 Ecology and Behaviour of the Ladybird Beetles (Coccinellidae). John Wiley & Sons. 2012. pp.  
418 488-519.
- 419 13. Pell JK, Baverstock J, Roy HE, Ware RL, Majerus MEN. Intraguild predation involving  
420 *Harmonia axyridis* : a review of current knowledge and future perspectives. In: Roy HE,  
421 Wajnberg E, editors. From Biological Control to Invasion: the Ladybird *Harmonia axyridis* as  
422 a Model Species. 2008. Springer Netherlands. pp. 147-168.
- 423 14. Snyder WE, Clevenger G, Eigenbrode SD. Intraguild predation and successful invasion by  
424 introduced ladybird beetles. *Oecologia*. 2004, 140(4): 559-565.
- 425 15. Polis GA, Holt RD. Intraguild Predation-The Dynamics of Complex Trophic Interactions.  
426 *Trends Ecol Evol*. 1992; 7(5): 151-154.
- 427 16. Polis GA, Myers CA, Holt RD. The Ecology and Evolution of Intraguild Predation - Potential  
428 Competitors That Eat Each Other. *Annu Rev Ecol Syst*. 1989; 20: 297-330.
- 429 17. Müller CB, Brodeur J. Intraguild predation in biological control and conservation biology.  
430 *Biol Control*. 2002; 25(3): 216-223.
- 431 18. Rosenheim JA, Kaya HK, Ehler LE, Marois JJ, Jaffee BA. Intraguild Predation Among  
432 Biological-Control Agents: Theory and Evidence. *Biol Control*. 1995; 5(3): 303-335.
- 433 19. Brown PM, Thomas CE, Lombaert E, Jeffries DL, Estoup A, Handley L-JL. The global spread of  
434 *Harmonia axyridis* (Coleoptera: Coccinellidae): distribution, dispersal and routes of  
435 invasion. *Biocontrol*. 2011; 56(4): 623-641.

- 436 20. Vandereycken A, Durieux D, Joie É, Haubruge É, Verheggen F. Habitat diversity of the  
437 Multicolored Asian ladybeetle *Harmonia axyridis* Pallas (Coleoptera: Coccinellidae) in  
438 agricultural and arboreal ecosystems: a review. *Biotechnologie, Agronomie, Société et*  
439 *Environnement*. 2012 ; 16(4) : 553-563.
- 440 21. Coderre D, Lucas É, Gagné I. The occurrence of *Harmonia axyridis* (Pallas) (Coleoptera:  
441 Coccinellidae) in Canada. *Can Entomol*. 1995; 127(4) : 609-611.
- 442 22. Coutanceau J-P. *Harmonia axyridis* (Pallas, 1773): une coccinelle asiatique introduite,  
443 acclimatée et en extension en France. *Bulletin de la Société entomologique de France*.  
444 2006 ; 111(3): 395-401.
- 445 23. Gordon RD. The Coccinellidae (Coleoptera) of America north of Mexico. *J New York Entomol*  
446 *S*. 1985; 93(1).
- 447 24. Lucas E, Vincent C, Labrie G, Chouinard G, Fournier F, Pelletier F, Lafontaine P, et al. The  
448 multicolored Asian ladybeetle *Harmonia axyridis* (Coleoptera: Coccinellidae) in Quebec  
449 agroecosystems ten years after its arrival. *Eur J Entomol*. 2007; 104(4): 737-743.
- 450 25. Nedvěd O, Háva J, Kulíková D. Record of the invasive alien ladybird *Harmonia axyridis*  
451 (Coleoptera, Coccinellidae) from Kenya. *ZooKeys*. 2011; 106: 77-81.
- 452 26. Roy HE, Brown PMJ, Adriaens T, Berkvens N, Borges I, Clusella-Trullas S, et al. The harlequin  
453 ladybird, *Harmonia axyridis*: global perspectives on invasion history and ecology. *Biol*  
454 *Invasions*. 2016; 18(4): 997-1044.

- 455 27. Soares AO, Borges I, Borges PA, Labrie G, Lucas E. *Harmonia axyridis*: What will stop the  
456 invader? BioControl. 2008; 53(1): 127-145.
- 457 28. Stals R, Prinsloo G. Discovery of an alien invasive, predatory insect in South Africa: the  
458 multicoloured Asian ladybird beetle, *Harmonia axyridis* (Pallas)(Coleoptera: Coccinellidae).  
459 S Afr J Sci. 2007; 103(3-4): 123-126.
- 460 29. Tedders W, Schaefer P. Release and establishment of *Harmonia axyridis* (Coleoptera:  
461 Coccinellidae) in the southeastern United States. Entomol News. 1994; 105(4): 228-243.
- 462 30. Ker KW, Pickering GJ, Dris R. Biology and control of the novel grapevine pest-The  
463 multicolored Asian lady beetle *Harmonia axyridis*. WFL Publisher Helsinki, Finland; 2005.
- 464 31. Linder C, Lorenzini F, Kehrli P. Potential impact of processed *Harmonia axyridis* on the taste  
465 of 'Chasselas' and 'Pinot noir'wines. Vitis. 2009; 48(2): 101-102.
- 466 32. Pickering G, Spink M, Kotseridis Y, Brindle I, Sears M, Inglis D. The influence of *Harmonia*  
467 *axyridis* morbidity on 2-Isopropyl-3-methoxy-pyrazine in 'Cabernet Sauvignon'wine. Vitis.  
468 2008; 47(4): 227-230.
- 469 33. Koch RL, Galvan TL. Bad side of a good beetle: the North American experience with  
470 *Harmonia axyridis*. BioControl. 2008; 53(1): 23-35.
- 471 34. Michaud JP. Invasion of the Florida Citrus Ecosystem by *Harmonia axyridis* (Coleoptera:  
472 Coccinellidae) and Asymmetric Competition with a Native Species, *Cycloneda sanguinea*.  
473 Environ Entomol. 2002; 31(5): 827-835.



- 474 35. Santos LDCD, Santos-Cividanes TMD, Cividanes FJ, Matos STSD. Biological aspects of  
475 *Harmonia axyridis* in comparison with *Cycloneda sanguinea* and *Hippodamia convergens*.  
476 Pesquisa Agropecuária Brasileira. 2013; 48(11): 1419-1425.
- 477 36. Brown PMJ, Adriaens T, Bathon H, Cuppen J, Goldarazena A, Hägg T, et al. *Harmonia axyridis*  
478 in Europe: spread and distribution of a non-native coccinellid. BioControl. 2008; 53(1): 5-  
479 21.
- 480 37. Brown PMJ, Ingels B, Wheatley A, Rhule EL, De Clercq P, Van Leeuwen T, et al. Intraguild  
481 predation by *Harmonia axyridis* (Coleoptera: Coccinellidae) on native insects in Europe:  
482 molecular detection from field samples. Entomol Sci. 2015; 18(1): 130-133.
- 483 38. Lucas E. Intraguild predation among aphidophagous predators. Eur J Entomol. 2005; 102:  
484 351-364.
- 485 39. Lucas E. Intraguild interactions. In: Hodek I, Van Emden HF, Honek A, editors. Ecology and  
486 Behaviour of the Ladybird beetles (Coccinellidae). John Wiley & Sons; 2012. pp. 343-374.
- 487 40. Mirande L, Desneux N, Haramboure M, Schneider M. Intraguild predation between an  
488 exotic and a native coccinellid in Argentina: the role of prey density. J Pest Sci. 2015; 88(1):  
489 155-162.
- 490 41. Ware R, Yguel B, Majerus M. Effects of competition, cannibalism and intra-guild predation  
491 on larval development of the European coccinellid *Adalia bipunctata* and the invasive  
492 species *Harmonia axyridis*. Ecol Entomol. 2009; 34(1): 12-19.

42. Hautier L, San Martin G, Callier P, de Biseau J-C, Grégoire J-C. Alkaloids provide evidence of intraguild predation on native coccinellids by *Harmonia axyridis* in the field. Biol Invasions. 2011; 13(8): 1805-1814.
43. Hautier L, Grégoire J-C, de Schauwers J, San Martin G, Callier P, Jansen J-P, et al. Intraguild predation by *Harmonia axyridis* on coccinellids revealed by exogenous alkaloid sequestration. Chemoecology. 2008; 18(3): 191-196.
44. Roy H, Wajnberg E. From biological control to invasion: the ladybird *Harmonia axyridis* as a model species. BioControl. 2008; 53(1): 1-4.
45. Fréchette B, Cormier D, Chouinard G, Vanoosthuysen F, Lucas E. Apple aphid, *Aphis spp.* (Hemiptera: Aphididae), and predator populations in an apple orchard at the non-bearing stage: The impact of ground cover and cultivar. Eur J Entomol. 2008; 105: 521-529.
46. Kabaluk J, Vernon R, Henderson D. Population development of the green peach aphid and beneficial insects in potato fields in British Columbia. Can Entomol. 2006; 138(5): 647-660.
47. Lucas É, Giroux S, Demougeot S, Duchesne RM, Coderre D. Compatibility of a natural enemy, *Coleomegilla maculata lengi* (Col., Coccinellidae) and four insecticides used against the Colorado potato beetle (Col., Chrysomelidae). J Appl Entomol. 2004; 128(3): 233-239.
48. Cottrell TE, Yeargan KV. Intraguild predation between an introduced lady beetle, *Harmonia axyridis* (Coleoptera: Coccinellidae), and a native lady beetle, *Coleomegilla maculata* (Coleoptera: Coccinellidae). J Kansas Entomol Soc. 1998; 71(2): 159-163.

- 512 49. Lundgren JG, Razzak AA, Wiedenmann RN. Population responses and food consumption by  
513 predators *Coleomegilla maculata* and *Harmonia axyridis* (Coleoptera: Coccinellidae) during  
514 anthesis in an Illinois cornfield. Environ Entomol. 2004; 33(4): 958-963.
- 515 50. Gagnon A-È, Heimpel GE, Brodeur J. The ubiquity of intraguild predation among predatory  
516 arthropods. PLoS One. 2011; 6(11): e28061.
- 517 51. Provost C, Coderre D, Lucas É, Bostanian NJ. Impact of Lambda-cyhalothrin on Intraguild  
518 Predation Among Three Mite Predators. Environ Entomol. 2003; 32(2): 256-263.
- 519 52. Lucas E, Maissonhaute J-E. Paysage et services écosystémiques, une nouvelle dimension dans  
520 la lutte aux insectes nuisibles. In: Ruiz J, Domon G, editors. Agriculture et paysage,  
521 Aménager autrement les territoires ruraux: Les Presses de l'Université de Montréal. 2014 ;  
522 pp. 175-196.
- 523 53. Provost C, Coderre D, Lucas E, Bostanian NJ. Impact d'une dose subletale de lambda-  
524 cyhalothrine sur les prédateurs intraguildes d'acariens phytophages en verger de  
525 pommiers. Phytoprotection. 2003; 84: 105-113.
- 526 54. Cutler GC, Scott-Dupree CD. Novaluron: Prospects and Limitations in Insect Pest  
527 Management. Pest Technology. 2007; 1(1): 38-46.
- 528 55. Cormier D, Chouinard G, Pelletier F, Vanoosthuyse F, Joannin R. An interactive model to  
529 predict codling moth development and insecticide application effectiveness. IOBC-WPRS  
530 Bulletin. 2016; 112: 65-70.

- 531 56. Cabrera P, Cormier D, Lucas É. Differential Sensitivity of an Invasive and an Indigenous  
532 Ladybeetle to Two Reduced-Risk Insecticides. *J Appl Entomol.* 2017; 141(9): 690–701.
- 533 57. Cabrera P, Cormier D, Lucas É. Sublethal Effects of Two Reduced-risk Insecticides: When the  
534 invasive ladybeetle is drastically affected whereas the indigenous not. *J Pest Sci.* 2018;  
535 91(3). pp 1153–1164
- 536 58. Dowd PF, Smith MC, Sparks TC. Detoxification of plant toxins by insects. *Insect Biochem.*  
537 1983; 13(5): 453-468.
- 538 59. Croft BA. Arthropod biological control agents and pesticides. New York: John Wiley and  
539 Sons; 1990.
- 540 60. Sokal R, Rohlf J. Biometry : the principles and practice of statistics in biological research.  
541 Rohlf FJ, editor. New York: New York W. H. Freeman; 1995.
- 542 61. McDonald JH. Handbook of Biological Statistics. Chi-square test of independence 2014  
543 Available from: <http://www.biostathandbook.com/chiind.html>.
- 544 62. Kleinbaum DG, Klein M. Survival Analysis : A Self-Learning Text. Third Edition ed. New York  
545 Springer; 2012.
- 546 63. Institute S. JMP Nonparametric 2015. Available from:  
547 <http://www.jmp.com/support/help/Nonparametric.shtml>.

- 548 64. Labrie G, Coderre D, Lucas E. Overwintering strategy of multicolored Asian lady beetle  
549 (Coleoptera: Coccinellidae): cold-free space as a factor of invasive success. Ann Entomol  
550 Soc Am. 2008; 101(5): 860-866.
- 551 65. Hodek I. Diapause/Dormancy. In: Hodek I, Honek A, Van Emden HF, editors. Ecology and  
552 Behaviour of the Ladybird Beetles (Coccinellidae). John Wiley & Sons. 2012. pp. 275-342.
- 553 66. Lucas E, Coderre D, Brodeur J. Intraguild predation among aphid predators: Characterization  
554 and influence of extraguild prey density. Ecology. 1998; 79(3): 1084-1092.
- 555 67. Lucas É, Rosenheim JA. Influence of extraguild prey density on intraguild predation by  
556 heteropteran predators: A review of the evidence and a case study. Biol Control. 2011;  
557 59(1): 61-67.
- 558 68. Finke DL, Denno RF. Intraguild predation diminished in complex-structured vegetation:  
559 implications for prey suppression. Ecology. 2002; 83(3): 643-652.
- 560 69. Janssen A, Sabelis MW, Magalhães S, Montserrat M, Van der Hammen T. Habitat structure  
561 affects intraguild predation. Ecology. 2007; 88(11): 2713-2719
- 562 70. Moser SE, Harwood JD, Obrycki JJ. Larval feeding on Bt hybrid and non-Bt corn seedlings by  
563 *Harmonia axyridis* (Coleoptera: Coccinellidae) and *Coleomegilla maculata* (Coleoptera:  
564 Coccinellidae). Environ Entomol. 2008; 37(2): 525-533.
- 565 71. Mills NJ, Beers EH, Shearer PW, Unruh TR, Amarasekare KG. Comparative analysis of  
566 pesticide effects on natural enemies in western orchards: A synthesis of laboratory  
567 bioassay data. Biol Control. 2016; 102: 17-25.

- 568 72. Lefebvre M, Bostanian NJ, Mauffette Y, Racette G, Thistlewood HA, Hardman JM.  
 569 Laboratory-based toxicological assessments of new insecticides on mortality and fecundity  
 570 of *Neoseiulus fallacis* (Acari: Phytoseiidae). J Econ Entomol. 2012; 105(3): 866-871.  
 571

| Intraguild predator (L2)                             | <i>C. maculata</i>                                                                                                                                                                     | <i>H. axyridis</i>                                                                                                                                                                       |
|------------------------------------------------------|----------------------------------------------------------------------------------------------------------------------------------------------------------------------------------------|------------------------------------------------------------------------------------------------------------------------------------------------------------------------------------------|
| Intraguild prey (L1)                                 | <i>H. axyridis</i>                                                                                                                                                                     | <i>C. maculata</i>                                                                                                                                                                       |
| Intraguild prey treated with water                   |  <p>A circular arena containing six red insects (labeled L1) and one black insect (labeled L2).</p>  |  <p>A circular arena containing one red insect (labeled L2) and five black insects (labeled L1).</p>  |
| Intraguild prey treated with insecticide (novaluron) |  <p>A circular arena containing six red insects (labeled L1) and one black insect (labeled L2).</p> |  <p>A circular arena containing one red insect (labeled L2) and five black insects (labeled L1).</p> |

a)

bioRxiv preprint doi: <https://doi.org/10.1101/349852>; this version posted June 18, 2018. The copyright holder for this preprint (which was not certified by peer review) is the author/funder, who has granted bioRxiv a license to display the preprint in perpetuity. It is made available under aCC-BY 4.0 International license.

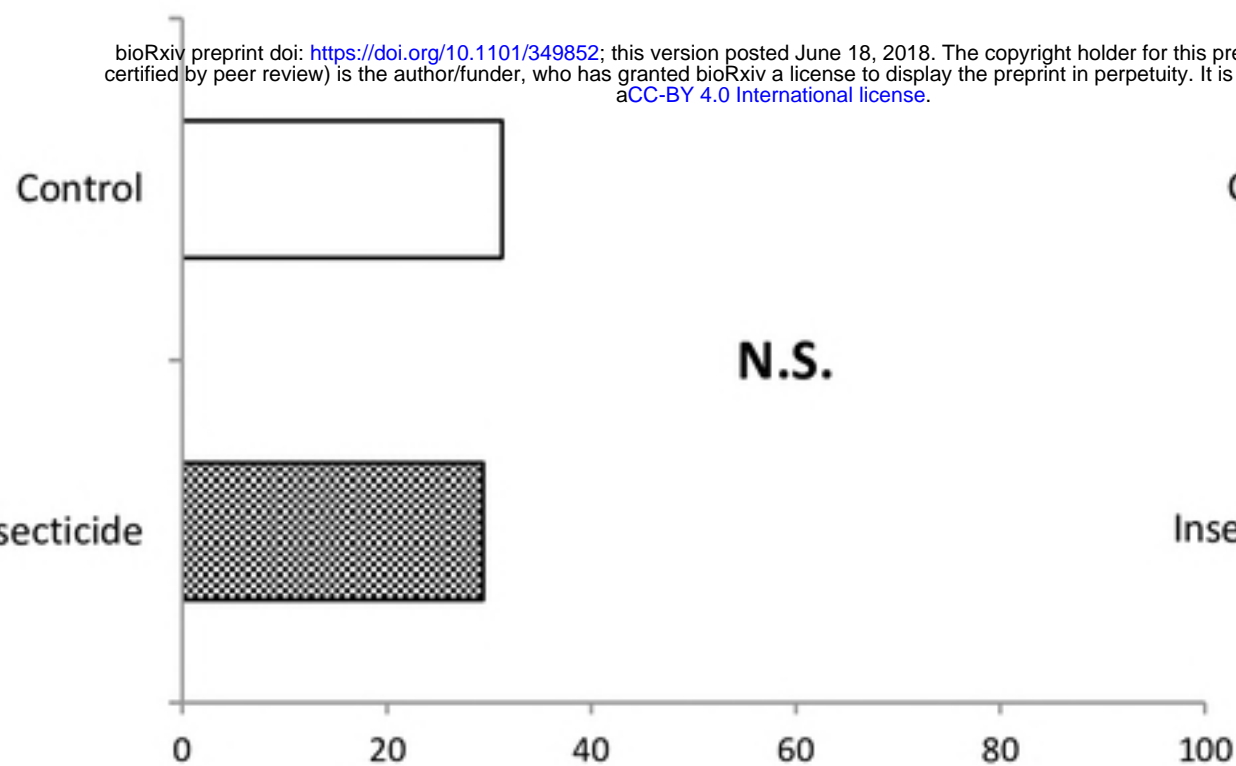

Mortality of the indigenous ladybeetle as the IG predator (%)

b)

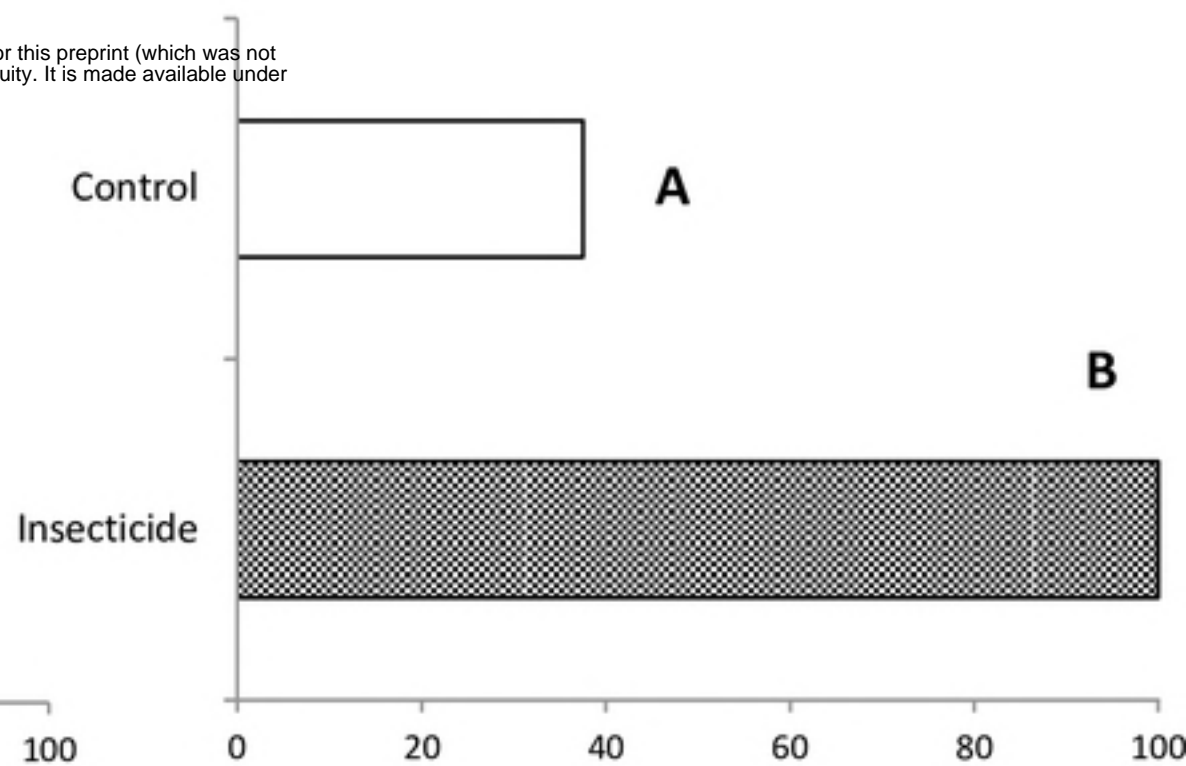

Mortality of the invasive ladybeetle as the IG predator (%)

c) Control

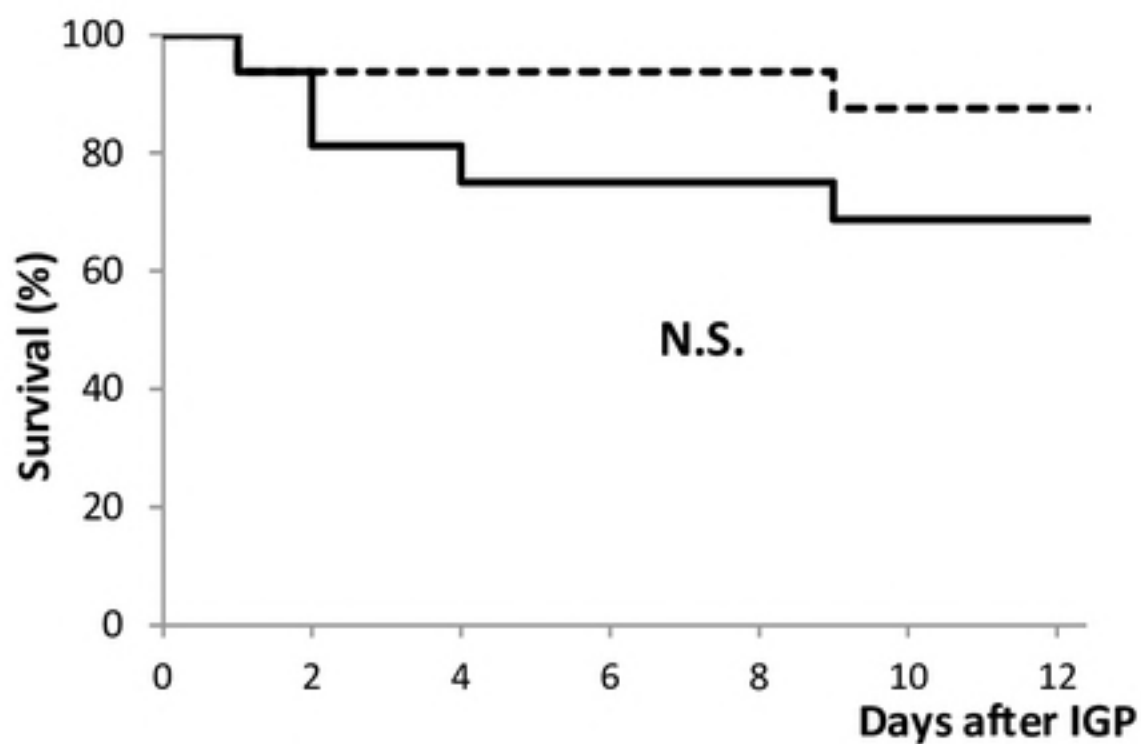

d) Insecticide

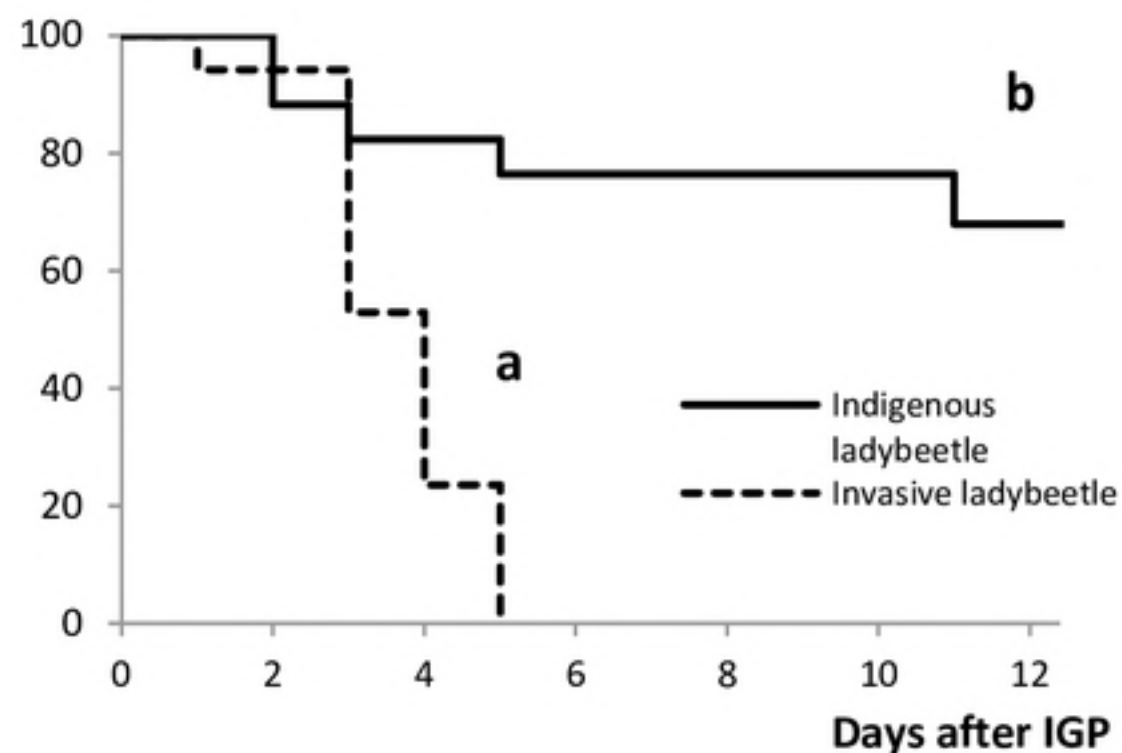



a)

bioRxiv preprint doi: <https://doi.org/10.1101/349852>; this version posted June 18, 2018. The copyright holder for this preprint (which was not certified by peer review) is the author/funder, who has granted bioRxiv a license to display the preprint in perpetuity. It is made available under aCC-BY 4.0 International license.

Control

Insecticide

N.S.

0

5

10

15

Time of development (days after IGP)

b)

Control

Insecticide

N.S.

0

2

4

6

8

10

12

14

Weight increase (mg)

a)

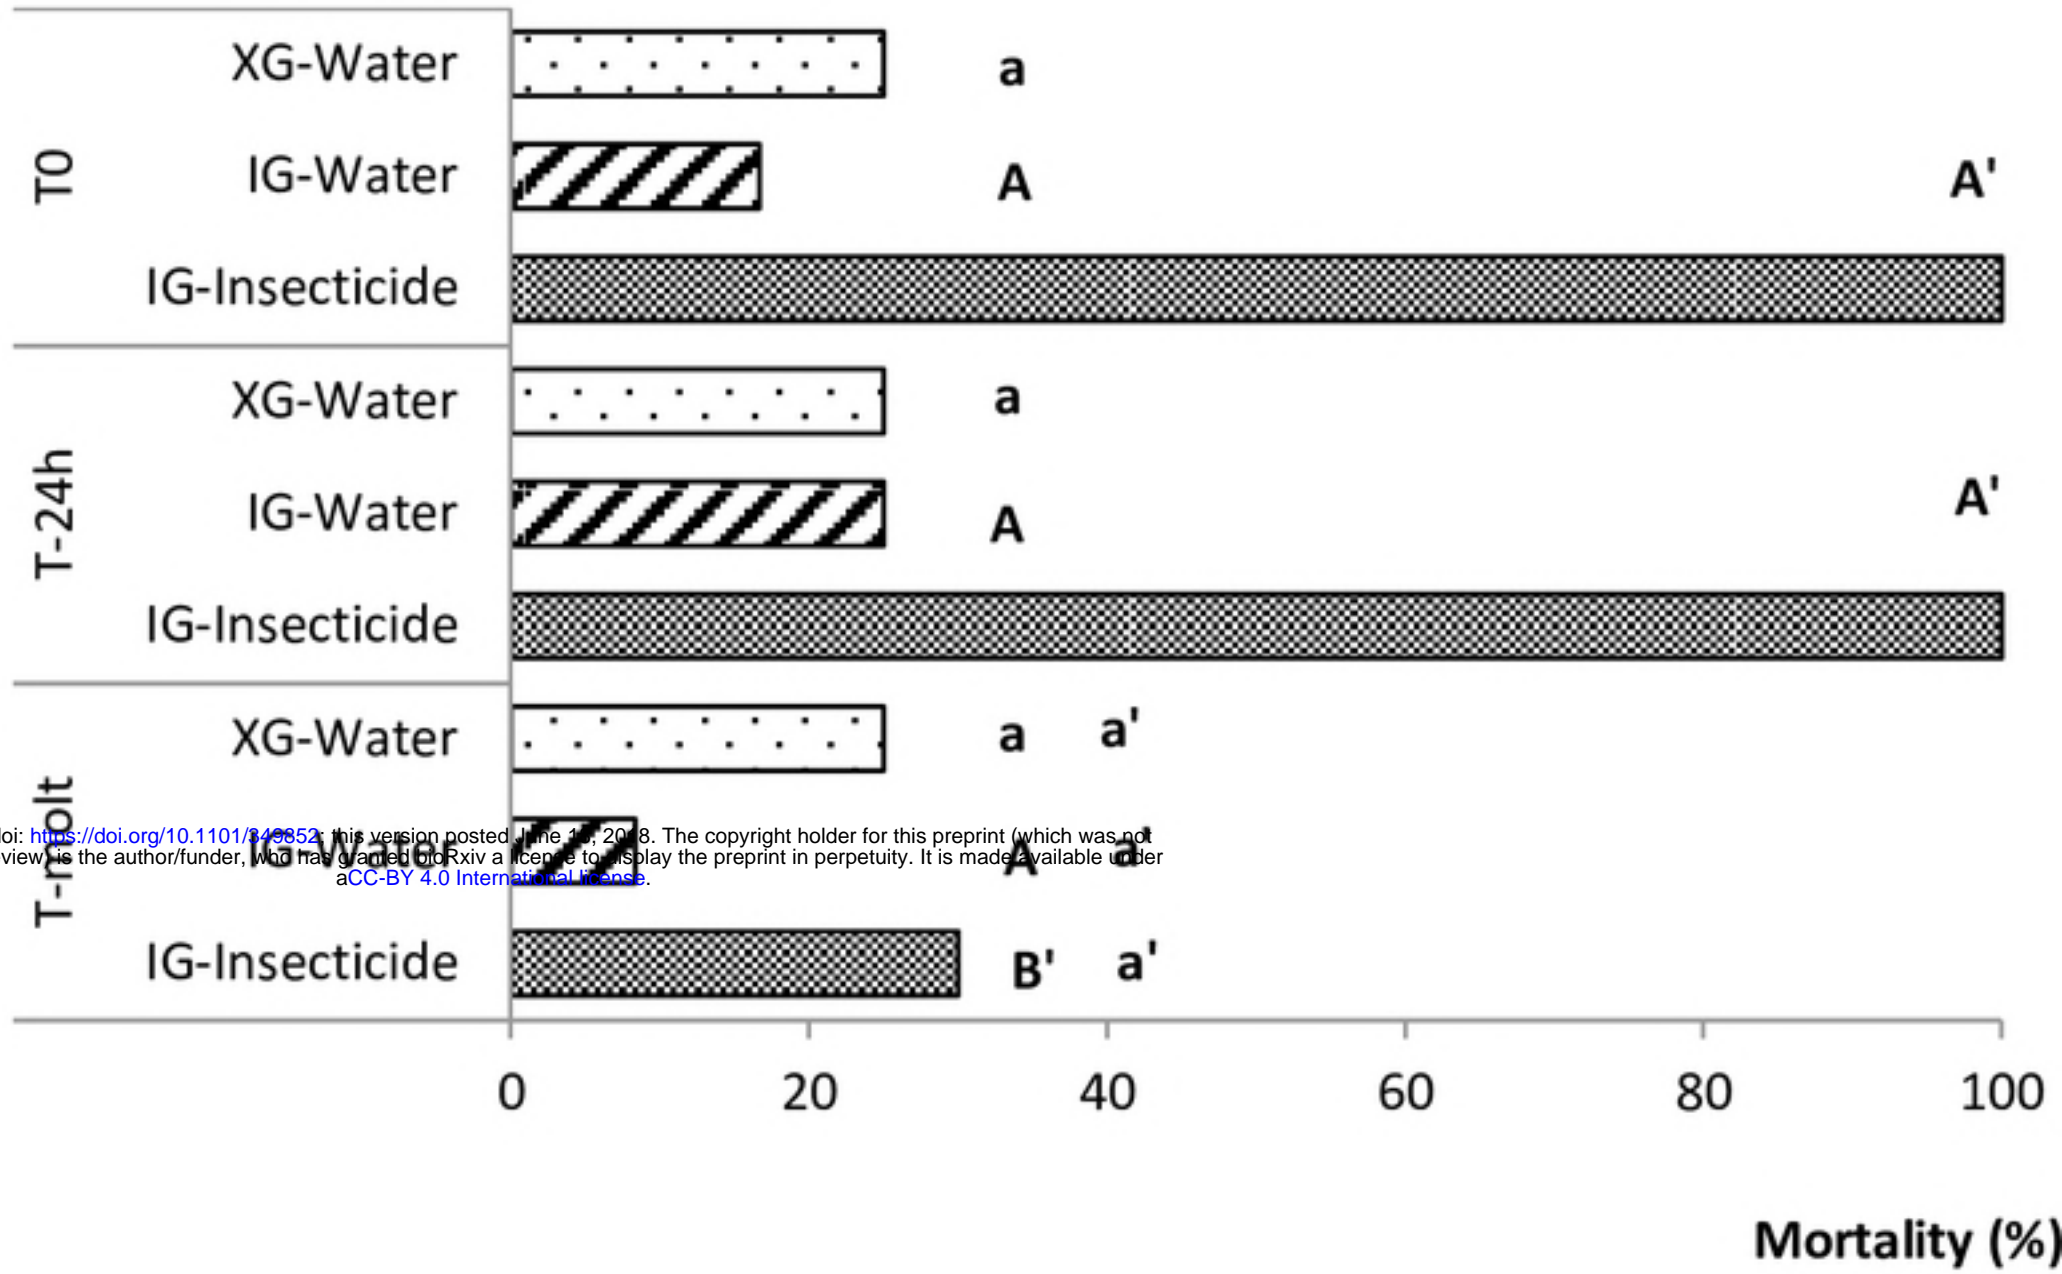

bioRxiv preprint doi: <https://doi.org/10.1101/349852>; this version posted June 12, 2018. The copyright holder for this preprint (which was not certified by peer review) is the author/funder, who has granted bioRxiv a license to display the preprint in perpetuity. It is made available under aCC-BY 4.0 International license.

b)

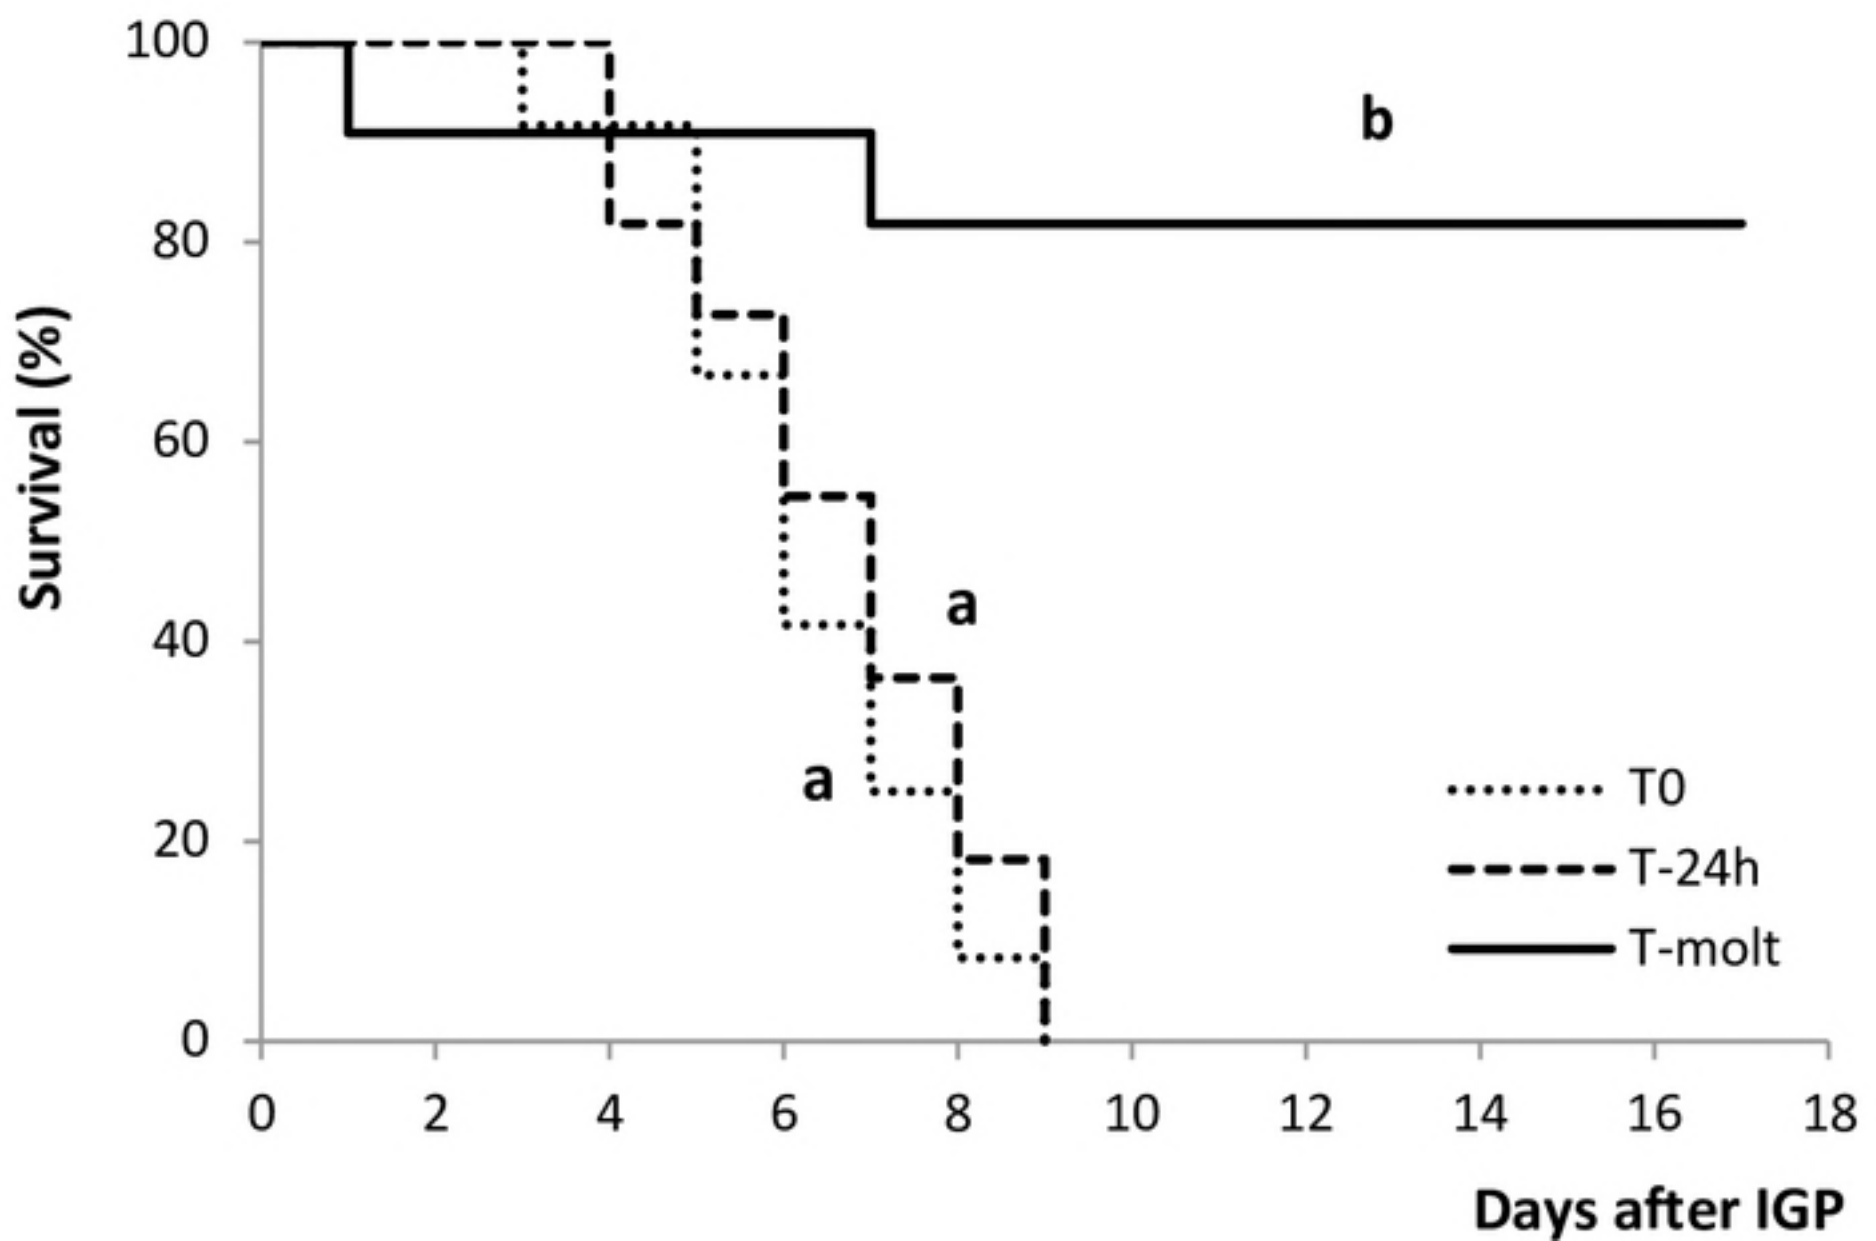

a)

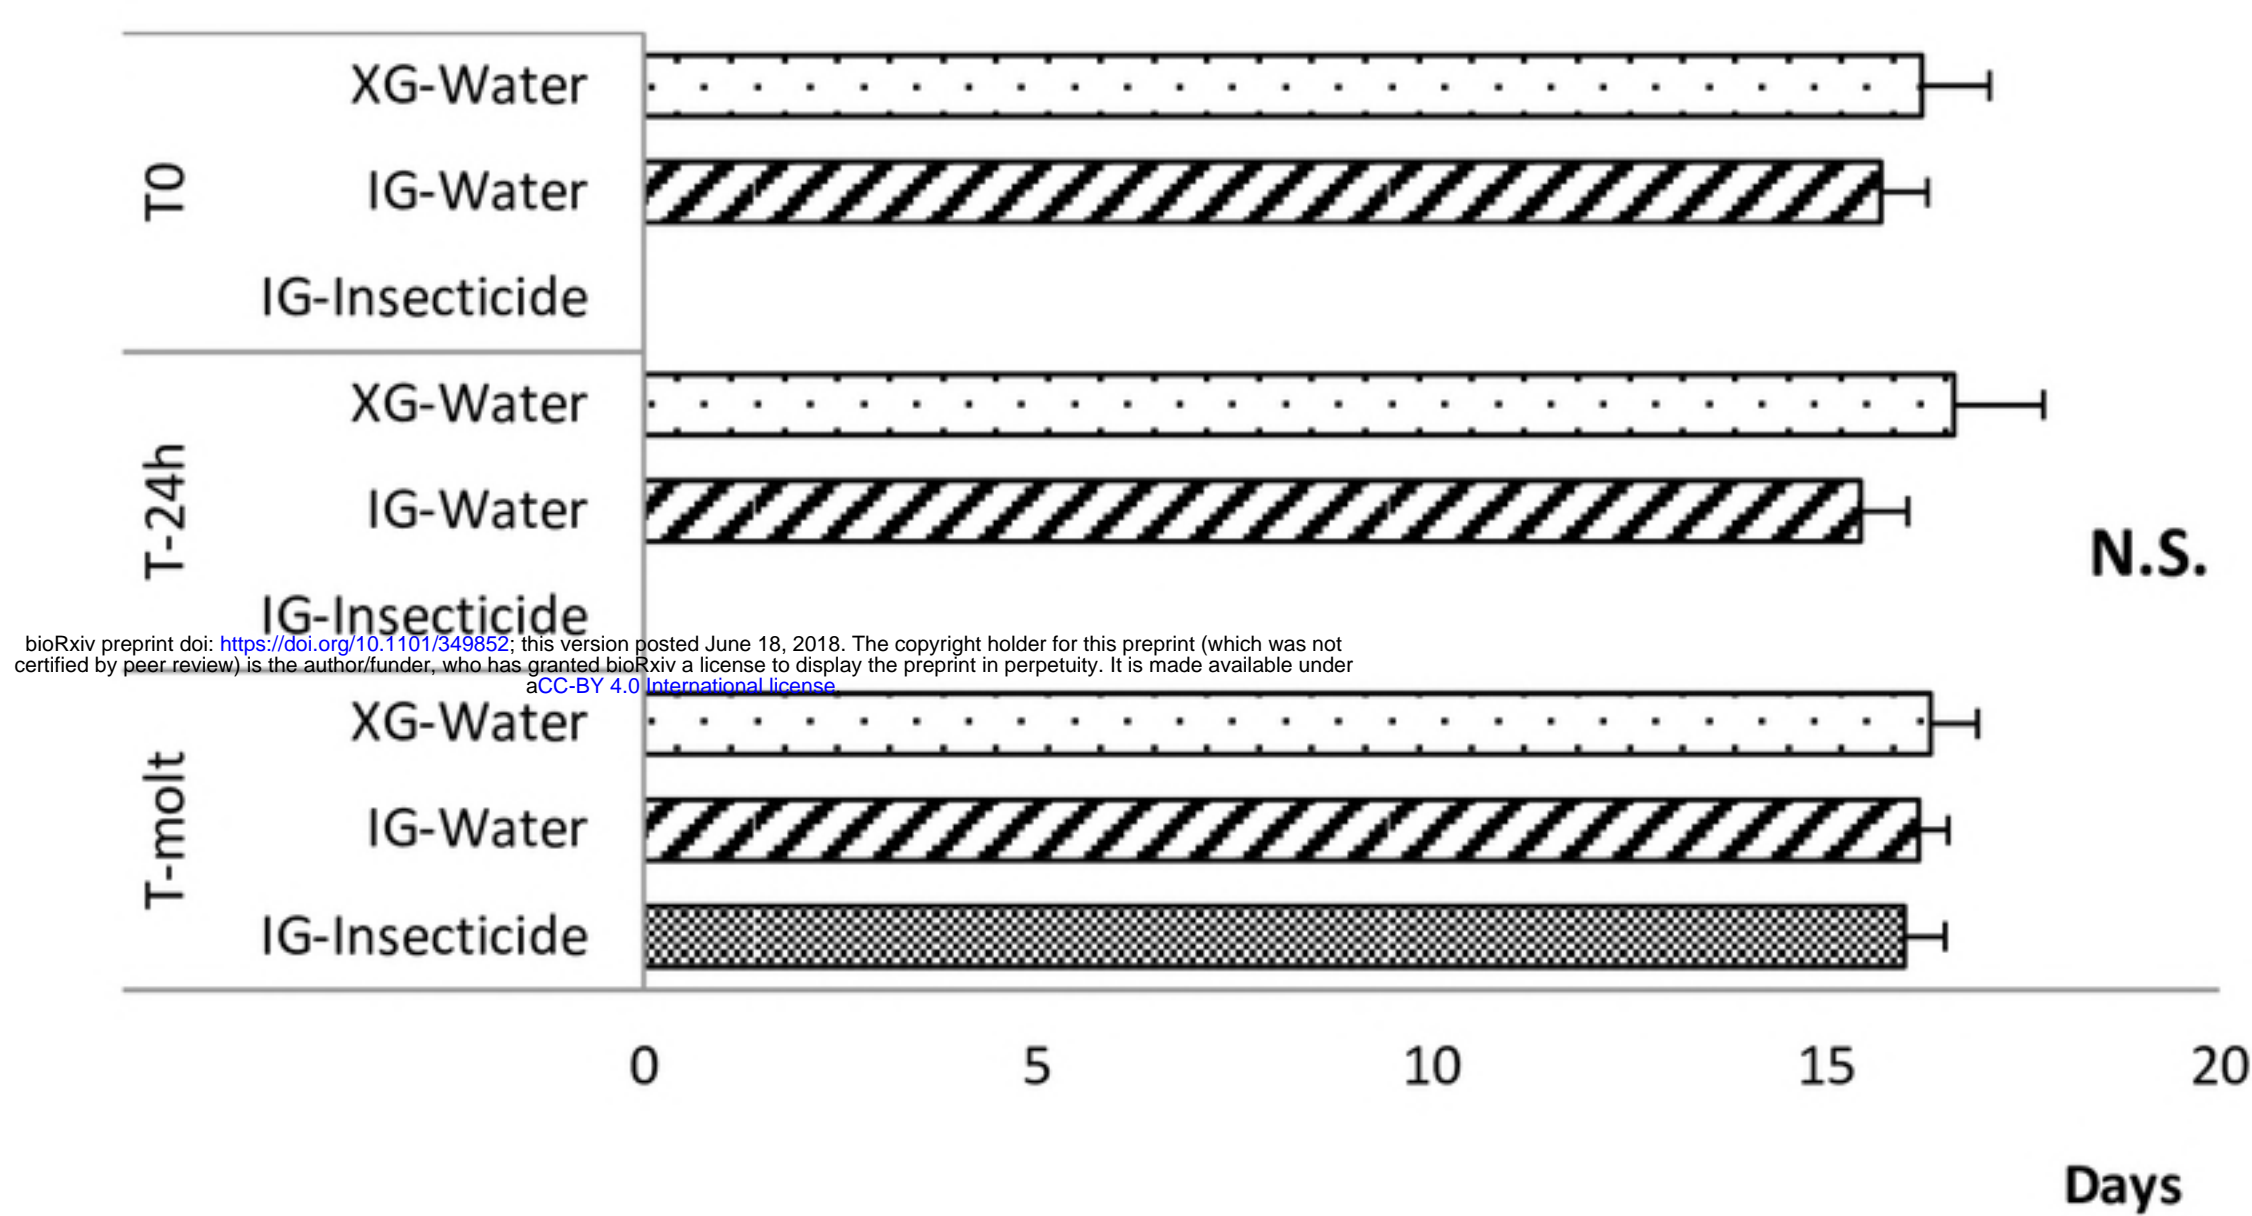

b)

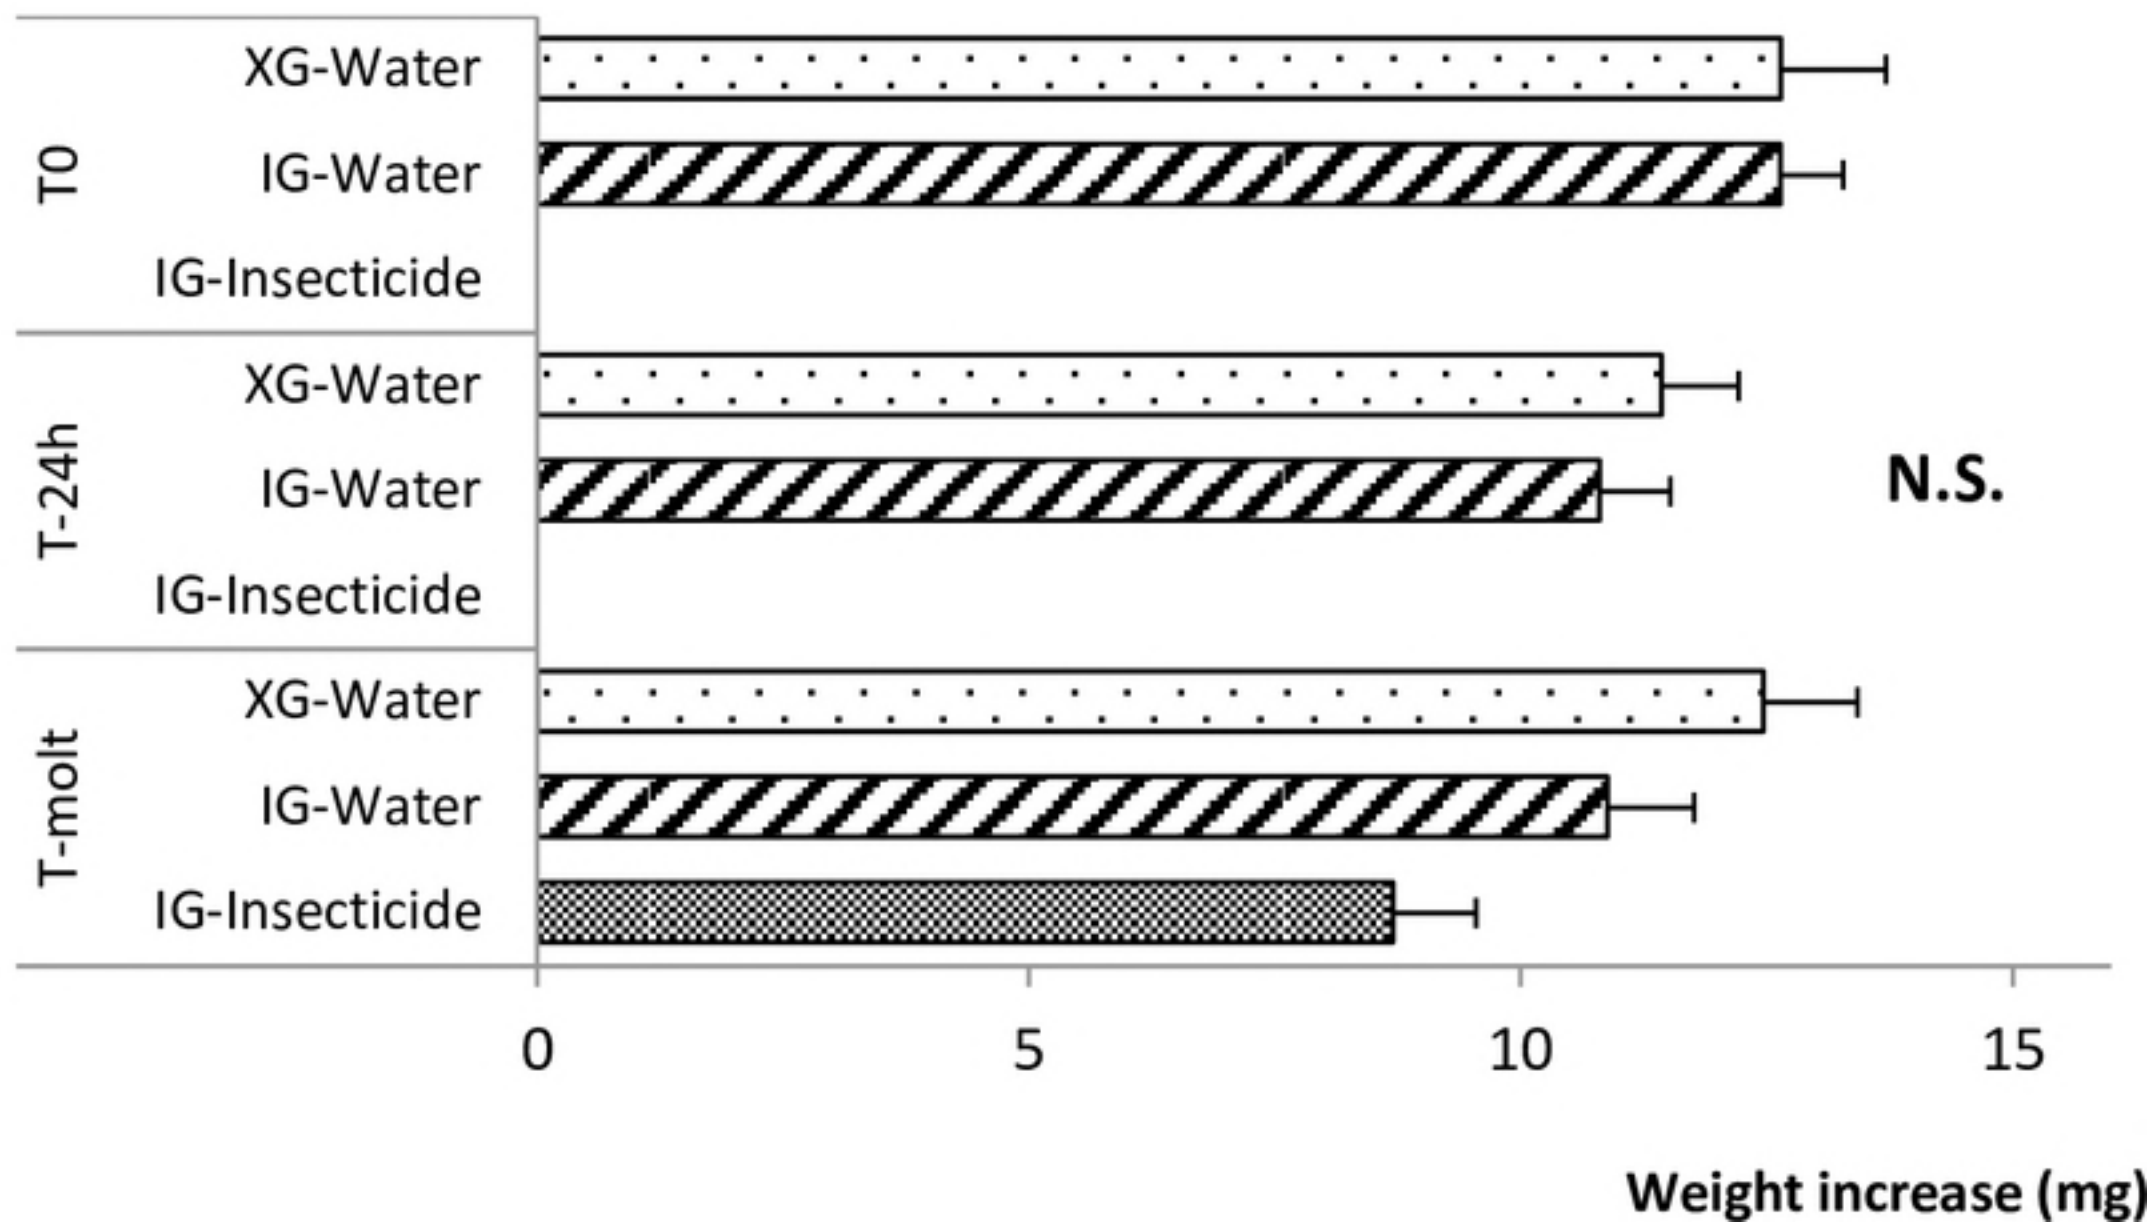

Source: http://biorxiv.org/content/10.1101/349852v1.full.pdf
